# Supplementary material
Source: ML conference proceedings conference paper supplement (https://openaccess.thecvf.com/content/CVPR_2019/html/Pavllo_3D_Human_Pose_CVPR_2019_paper.html)
Supplement: Supplementary file 2 [file Pavllo_3D_Human_Pose_CVPR_2019_supplemental.zip]

Archive with 2 entries (2 files):
- appendix.pdf
- video.mp4
